# Supplementary material
Source: bioRxiv or medRxiv preprint supplement (https://www.biorxiv.org/highwire/filestream/55293/field_highwire_adjunct_files/2/037762-3.pdf)
Supplement: Supplementary file [file 037762-3.pdf]

Supplementary Table 3. Ninety-six indexes for A-idx-i7 primers.

| Index | Sequence | Reverse complemented index (as sequenced) |
|-------|----------|-------------------------------------------|
| i7_1  | ATCCGCAT | ATGCGGAT                                  |
| i7_2  | ATTGAAGT | ACTTCAAT                                  |
| i7_3  | CTCTGCGT | ACGCAGAG                                  |
| i7_4  | GATACGCA | TGCGTATC                                  |
| i7_5  | TACGTTCG | CGAACGTA                                  |
| i7_6  | TGAATCCT | AGGATTCA                                  |
| i7_7  | GGCTATAA | TTATAGCC                                  |
| i7_8  | CACAACCT | AGGTTGTG                                  |
| i7_9  | TCAGCCTC | GAGGCTGA                                  |
| i7_10 | GGATTGTT | AACAATCC                                  |
| i7_11 | CATGACGA | TCGTCATG                                  |
| i7_12 | GTCCACTA | TAGTGGAC                                  |
| i7_13 | TCGAGTTT | AAACTCGA                                  |
| i7_14 | TGAGCACA | TGTGCTCA                                  |
| i7_15 | GTGTCACC | GGTGACAC                                  |
| i7_16 | AGTCACAA | TTGTGACT                                  |
| i7_17 | AGGCCGAA | TTCGGCCT                                  |
| i7_18 | TTAGCTGC | GCAGCTAA                                  |
| i7_19 | CTGTTAAA | TTTAACAG                                  |
| i7_20 | AAACAAAC | GTTTGTTT                                  |
| i7_21 | CCGGAAAT | ATTTCCGG                                  |
| i7_22 | GGTAGCCA | TGGCTACC                                  |
| i7_23 | TGCCACTA | TAGTCGCA                                  |
| i7_24 | GTCTGGAA | TTCCAGAC                                  |
| i7_25 | GTATTGAC | GTCAATAC                                  |
| i7_26 | CGGCTGTA | TACAGCCG                                  |
| i7_27 | ACTGGTCA | TGACCAGT                                  |
| i7_28 | ATCGTAAC | GTTACGAT                                  |
| i7_29 | AGGACACA | TGTGTCCT                                  |
| i7_30 | TTGACCCA | TGGGTCAA                                  |
| i7_31 | GAGCGGAA | TTCCGCTC                                  |
| i7_32 | ACCAGTTT | AAACTGGT                                  |
| i7_33 | ACTCATAC | GTATGAGT                                  |
| i7_34 | AGCATGCC | GGCATGCT                                  |
| i7_35 | CGTTGCCT | AGGCAACG                                  |
| i7_36 | TTATGACC | GGTCATAA                                  |
| i7_37 | GCTCGTAG | CTACGAGC                                  |
| i7_38 | CCAGACAG | CTGTCTGG                                  |
| i7_39 | CTTAGGCC | GGCCTAAG                                  |
| i7_40 | CAAGGGTT | AACCCTTG                                  |

|       |          |           |
|-------|----------|-----------|
| i7_41 | TGCACCAG | CTGGTGCA  |
| i7_42 | TGGGAATT | AATTCCCA  |
| i7_43 | ACGCTTAA | TTAAGCGT  |
| i7_44 | TTGGAGAC | GTCTCCAA  |
| i7_45 | ATGACAAC | GTTGTCAT  |
| i7_46 | AACGATTT | AAATCGTT  |
| i7_47 | AAGCCTTC | GAAGGCTT  |
| i7_48 | AGTCCGTG | CACGGACT  |
| i7_49 | AGCTTCGA | TCGAAGCT  |
| i7_50 | GAGAAACC | GGTTTCTC  |
| i7_51 | ATTGGCCC | GGGCCAAT  |
| i7_52 | CGACATTT | AAATGTCTG |
| i7_53 | ATGCATAT | ATATGCAT  |
| i7_54 | GCTACCGT | ACGGTAGC  |
| i7_55 | TAACCTCT | AGAAGTTA  |
| i7_56 | AAGTATTG | CAATACTT  |
| i7_57 | CGTGGGAT | ATCCCACG  |
| i7_58 | AAGAAGGT | ACCTTCTT  |
| i7_59 | GAGTGTAC | GTACACTC  |
| i7_60 | CAGGTTGC | GCAACCTG  |
| i7_61 | TAAACCGA | TCGGTTTA  |
| i7_62 | TGCTGACG | CGTCAGCA  |
| i7_63 | ACTCGGAA | TTCCGAGT  |
| i7_64 | CTGAAGGG | CCCTTCAG  |
| i7_65 | GCATCACT | AGTGATGC  |
| i7_66 | AAACTGTG | CACAGTTT  |
| i7_67 | ATCTTGGC | GCCAAGAT  |
| i7_68 | GCCAACAT | ATGTTGGC  |
| i7_69 | TGTTATCA | TGATAACA  |
| i7_70 | TACCGCTC | GAGCGGTA  |
| i7_71 | AGGTTCCC | GGGAACCT  |
| i7_72 | CTGTTTCC | GGAAACAG  |
| i7_73 | TTGCATTC | GAATGCAA  |
| i7_74 | TTCGTTAT | ATAACGAA  |
| i7_75 | TCGGTCAT | ATGACCGA  |
| i7_76 | AATGTATG | CATACATT  |
| i7_77 | AATAAGGA | TCCTTATT  |
| i7_78 | AAACGTGA | TCACGTTT  |
| i7_79 | TCTGATTT | AAATCAGA  |
| i7_80 | CCTTTGTC | GACAAAGG  |
| i7_81 | GCCAAAGC | GCTTTGGC  |
| i7_82 | ATGGTCTG | CAGACCAT  |
| i7_83 | AAAGCCCC | CGGGCTTT  |
| i7_84 | TTCTAGGA | TCCTAGAA  |

|       |          |          |
|-------|----------|----------|
| i7_85 | GGTAAATC | GATTTACC |
| i7_86 | CATTTCTA | TAGAAATG |
| i7_87 | AGGTATAT | ATATACCT |
| i7_88 | ACCCTCAA | TTGAGGGT |
| i7_89 | CAGACTCG | CGAGTCTG |
| i7_90 | AATCGAAG | CTTCGATT |
| i7_91 | AAGGCGCT | AGCGCCTT |
| i7_92 | CATTCGGG | CCCGAATG |
| i7_93 | TACGCGAG | CTCGCGTA |
| i7_94 | GTATACGT | ACGTATAC |
| i7_95 | AAGTTGTC | GACAACTT |
| i7_96 | ATATGCAA | TTGCATAT |
